# Supplementary material
Source: PubMed Central journal article supplement (PMC1413750)

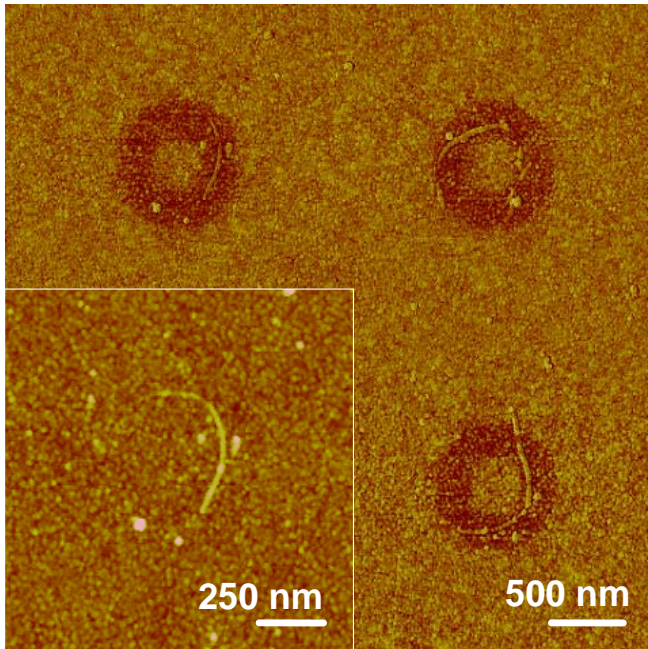

Supplement: pnas_0511022103_1.pdf [file pnas_0511022103_1.pdf]

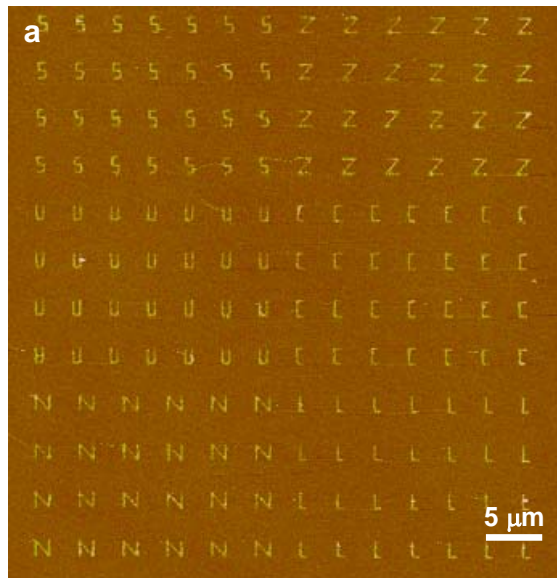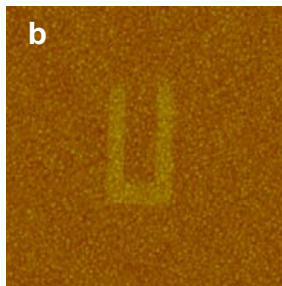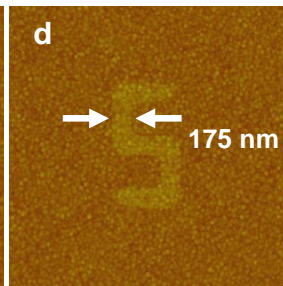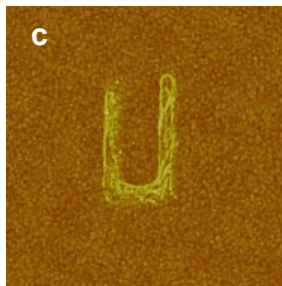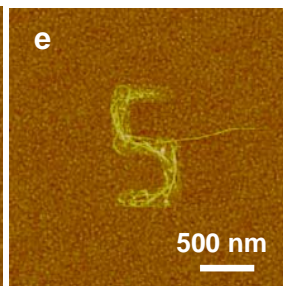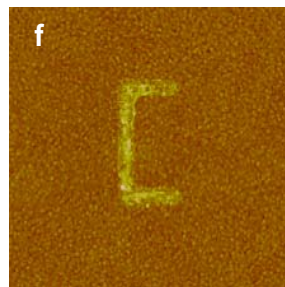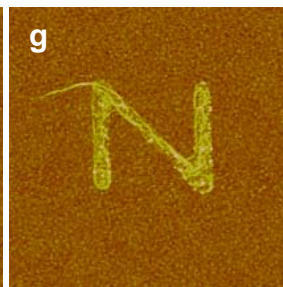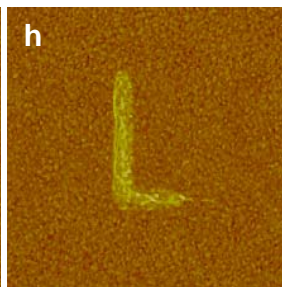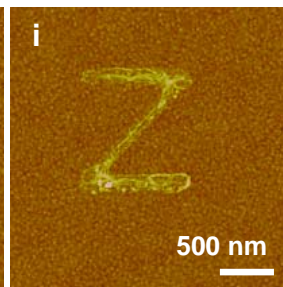

Supplement: pnas_0511022103_2.pdf [file pnas_0511022103_2.pdf]

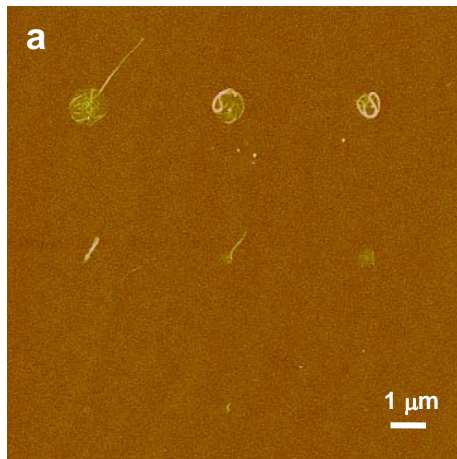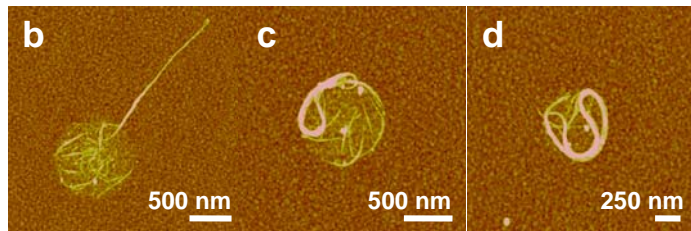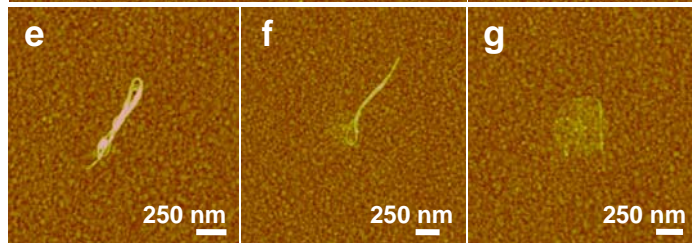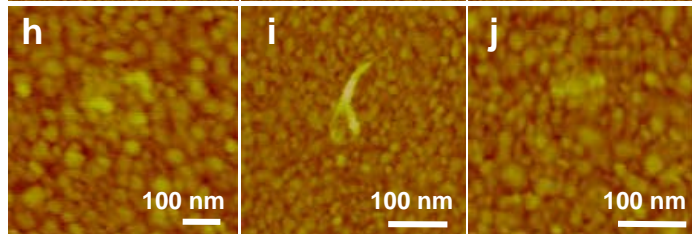

Supplement: pnas_0511022103_3.pdf [file pnas_0511022103_3.pdf]

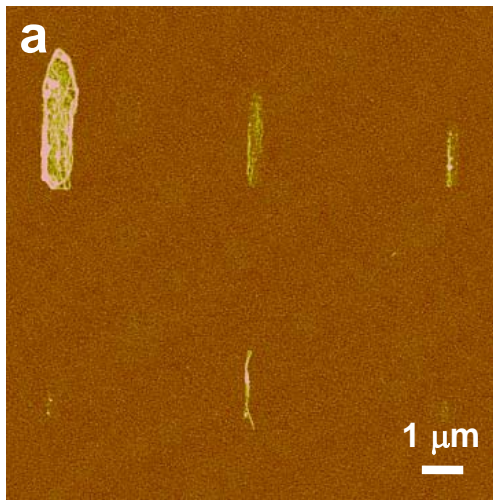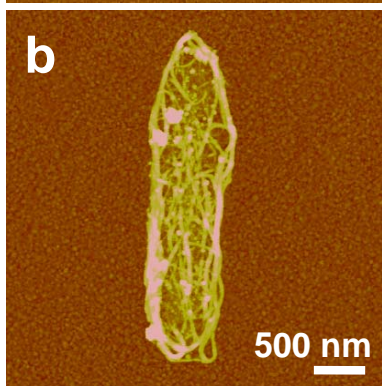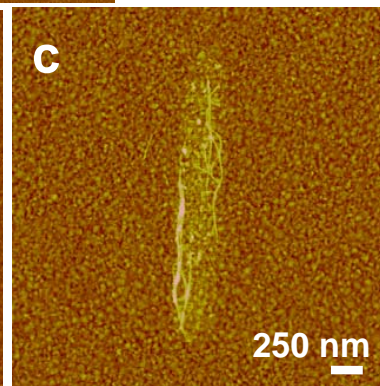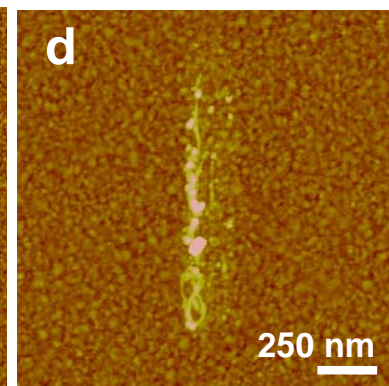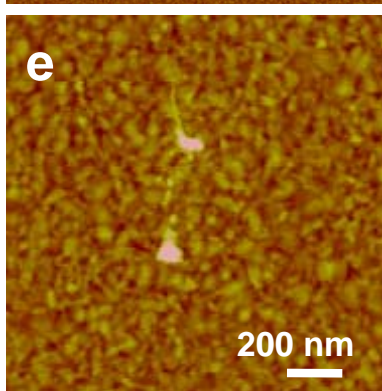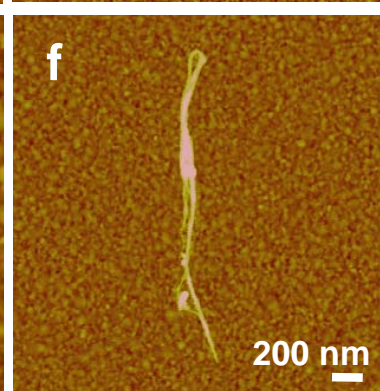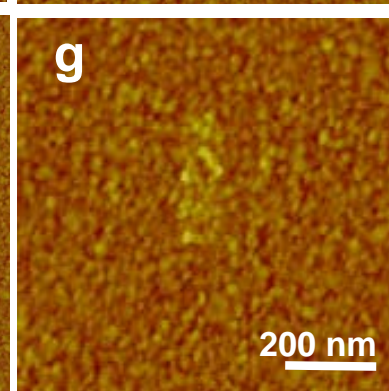

Supplement: pnas_0511022103_4.pdf [file pnas_0511022103_4.pdf]

**a**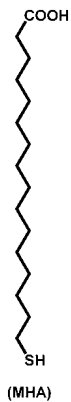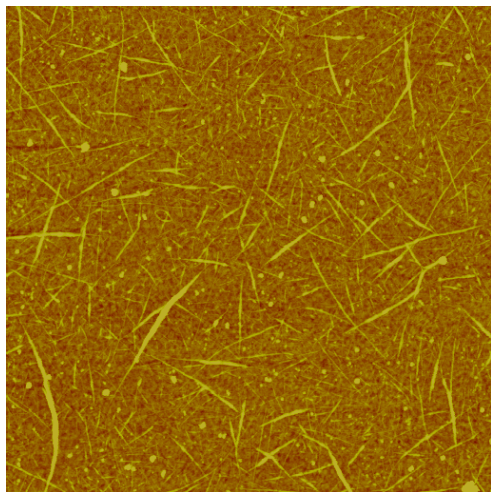**b**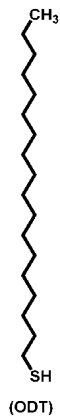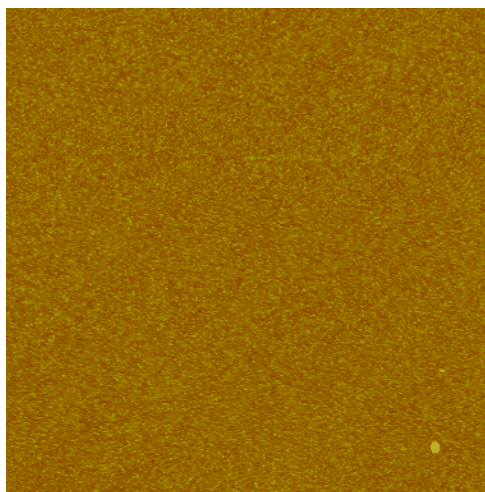**c**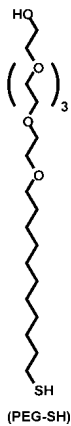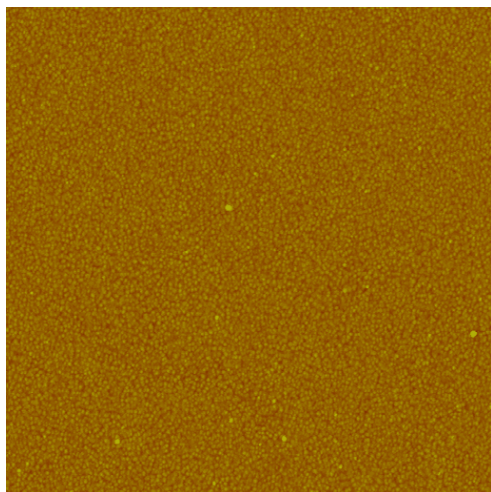**d**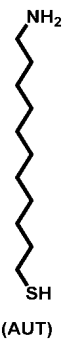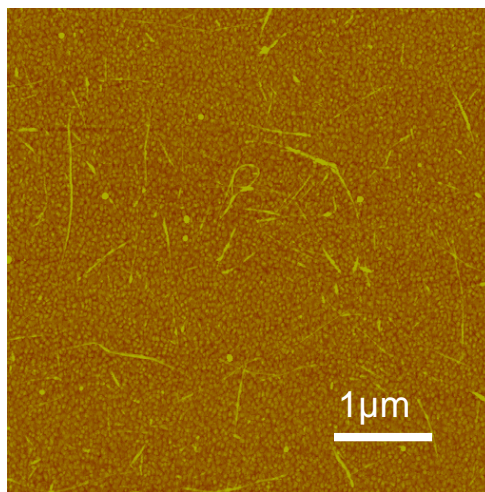

Supplement: pnas_0511022103_5.pdf [file pnas_0511022103_5.pdf]

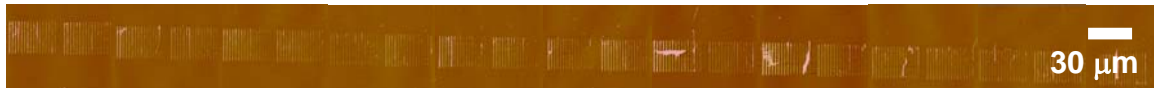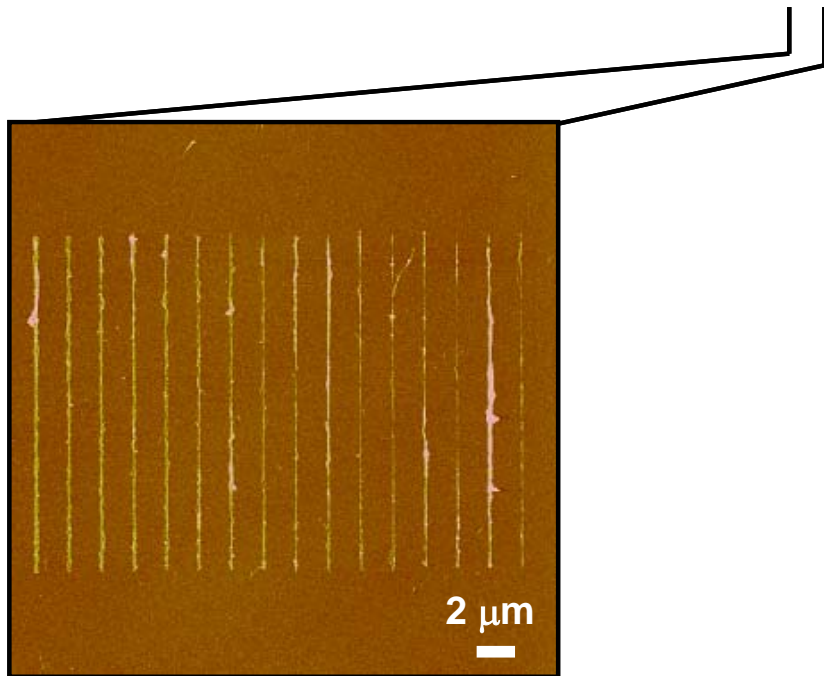

Supplement: pnas_0511022103_6.pdf [file pnas_0511022103_6.pdf]

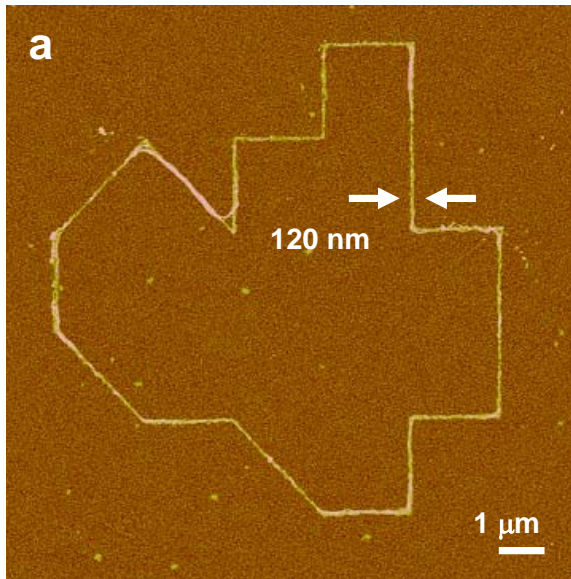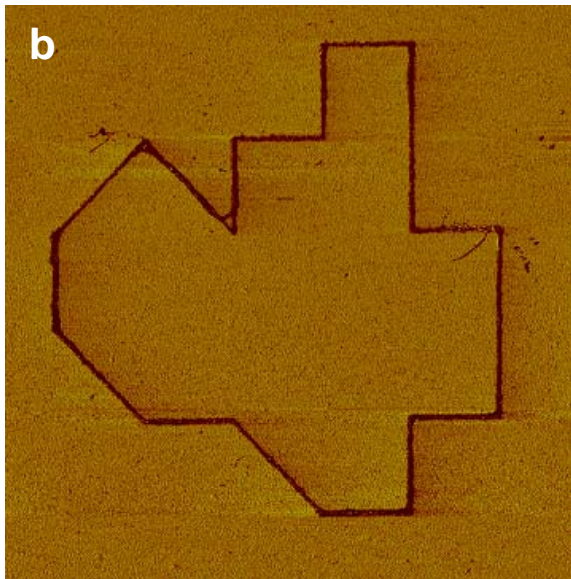

Supplement: pnas_0511022103_7.pdf [file pnas_0511022103_7.pdf]
